# Supplementary material
Source: HighWire-hosted journal article supplement (http://cmajopen.ca/highwire/filestream/81366/field_highwire_adjunct_files/2/2020-0030-3-at.pdf)
Supplement: 2020-0030-3-at.pdf [file 2020-0030-3-at.pdf]

**Appendix 3 (as supplied by the authors):** Description of each innovation (n=24)

| Type of innovation |               | Scalability ranking<br>(criteria assessed) |                    |                                     | Aim(s) of the innovation <sup>1</sup>                                                                                                                                                                                                                                                                                            |
|--------------------|---------------|--------------------------------------------|--------------------|-------------------------------------|----------------------------------------------------------------------------------------------------------------------------------------------------------------------------------------------------------------------------------------------------------------------------------------------------------------------------------|
| Type               | Subtype       | High<br>(10-16)                            | Medium<br>(4 to 9) | Low<br>(0 to 3)                     |                                                                                                                                                                                                                                                                                                                                  |
| Managing<br>(n=15) | Navigating    |                                            |                    | <input checked="" type="checkbox"/> | Adapt our service to reach a very vulnerable clientele who needs care.                                                                                                                                                                                                                                                           |
|                    | Navigating    | <input checked="" type="checkbox"/>        |                    |                                     | Communicate with the elderly alone to stimulate their cognition, help them with local services, help remind them to take their medication, detect falls at home, take their blood pressure and saturation, and transmit their vital signs to home care services, connect them with their families using artificial intelligence. |
|                    | Navigating    | <input checked="" type="checkbox"/>        |                    |                                     | Improve access to a family physician for socially disadvantaged patients.                                                                                                                                                                                                                                                        |
|                    | Navigating    | <input checked="" type="checkbox"/>        |                    |                                     | Implement and evaluate the integration of chronic disease prevention and management services by nurses and other professionals with training in this approach and work with the family medicine group                                                                                                                            |
|                    | Navigating    | <input checked="" type="checkbox"/>        |                    |                                     | Support and guide patients on how to discuss their health with their caregivers and prepare their medical appointments to facilitate their active involvement in self-care.                                                                                                                                                      |
|                    | Navigating    | <input checked="" type="checkbox"/>        |                    |                                     | Improve marginalized peoples' access to and quality of health services.                                                                                                                                                                                                                                                          |
|                    | Navigating    | <input checked="" type="checkbox"/>        |                    |                                     | Reduce pressure on primary care services while contributing to patient empowerment.                                                                                                                                                                                                                                              |
|                    | Navigating    | <input checked="" type="checkbox"/>        |                    |                                     | Make pulmonary rehabilitation service and the related specialized interdisciplinary teams accessible.                                                                                                                                                                                                                            |
|                    | Navigating    | <input checked="" type="checkbox"/>        |                    |                                     | Allow the user to be quickly supported by the right person in the right place while respecting the services that are already in place in the health system network as well as in the family medicine group.                                                                                                                      |
|                    | Collaborating |                                            |                    | <input checked="" type="checkbox"/> | Facilitate the collaboration between healthcare professionals with a free access platform that uses knowledge transfer and the sharing of best clinical practices to optimise the quality of care to patients.                                                                                                                   |
|                    | Collaborating | <input checked="" type="checkbox"/>        |                    |                                     | Disseminate the results of health research to the general public.                                                                                                                                                                                                                                                                |
|                    | Collaborating |                                            |                    | <input checked="" type="checkbox"/> | Systematize, in a collaborative and interdisciplinary manner, the management of work stoppages for common mental health problems.                                                                                                                                                                                                |
|                    | Collaborating |                                            |                    | <input checked="" type="checkbox"/> | Modify the paradigm of approach and treatment of mental health disorders by the family physician.                                                                                                                                                                                                                                |
|                    | Prescription  | <input checked="" type="checkbox"/>        |                    |                                     | Improve the safety of drugs by providing a collaborative service on electronic prescriptions while protecting patient data. .                                                                                                                                                                                                    |

| Type of innovation                                                                                                                      |                                                                   | Scalability ranking<br>(criteria assessed) |                                     |                 | Aim(s) of the innovation <sup>1</sup>                                                                                                                                                                                                          |
|-----------------------------------------------------------------------------------------------------------------------------------------|-------------------------------------------------------------------|--------------------------------------------|-------------------------------------|-----------------|------------------------------------------------------------------------------------------------------------------------------------------------------------------------------------------------------------------------------------------------|
| Type                                                                                                                                    | Subtype                                                           | High<br>(10-16)                            | Medium<br>(4 to 9)                  | Low<br>(0 to 3) |                                                                                                                                                                                                                                                |
|                                                                                                                                         | Prescription                                                      |                                            | <input checked="" type="checkbox"/> |                 | Promote the self-management of chronic pain for reducing its functional impact                                                                                                                                                                 |
| Preventing<br>(n=8)                                                                                                                     | Capacity building                                                 |                                            | <input checked="" type="checkbox"/> |                 | Illustrate the usefulness of the PARS3 platform in a real world context through the use of a tool aiming to obtain information on the management of diabetes in a family medicine group in a context of continuous improvement quality.        |
|                                                                                                                                         | Capacity building                                                 | <input checked="" type="checkbox"/>        |                                     |                 | Maintain skills, integrate evidence into practice, and establish standardized practices.                                                                                                                                                       |
|                                                                                                                                         | Capacity building                                                 | <input checked="" type="checkbox"/>        |                                     |                 | Foster the culture of care and the quality improvement of services.                                                                                                                                                                            |
|                                                                                                                                         | Public health surveillance                                        | <input checked="" type="checkbox"/>        |                                     |                 | To implement a routine prevention strategy to reduce the harmful effects of polypharmacy in older adults.                                                                                                                                      |
|                                                                                                                                         | Public health surveillance                                        | <input checked="" type="checkbox"/>        |                                     |                 | Personalize the treatments of patients in primary health care.                                                                                                                                                                                 |
|                                                                                                                                         | Public health surveillance                                        |                                            | <input checked="" type="checkbox"/> |                 | Collect anonymous, valid, and reliable information about primary care patients from electronic medical records (EMR) used by family physicians and nurse practitioners to facilitate research, monitoring and continuous improvement practices |
|                                                                                                                                         | Marshalling health services or health-related services            |                                            | <input checked="" type="checkbox"/> |                 | Promote a healthy lifestyle.                                                                                                                                                                                                                   |
|                                                                                                                                         | Restrictions on advertising, promotion or sponsorship of products | <input checked="" type="checkbox"/>        |                                     |                 | Optimize the use of medications by seniors.                                                                                                                                                                                                    |
| Therapeutic<br>(n=1)                                                                                                                    | Assisting or promoting exercise                                   | <input checked="" type="checkbox"/>        |                                     |                 | Improve the quality of life and decrease exacerbations and hospitalizations of patients with chronic obstructive pulmonary disease.                                                                                                            |
| <b>Note:</b> <sup>1</sup> We translated information provided in French; only two innovation teams provided this information in English. |                                                                   |                                            |                                     |                 |                                                                                                                                                                                                                                                |
